# **Mycorrhizal symbiosis alleviates plant water deficit within and across plant generations via plasticity**

Javier Puy<sup>1,2</sup>, Carlos P. Carmona<sup>3</sup>, Inga Hiiesalu<sup>3</sup>, Maarja Öpik<sup>3</sup>, Francesco de Bello<sup>1,4</sup>,  
Mari Moora<sup>3</sup>

1. Department of Botany, Faculty of Sciences, University of South Bohemia, Na Zlaté Stoce 1, 370 05, České Budějovice, Czech Republic
2. Zoology, School of Natural Sciences, Trinity College Dublin, Dublin 2, Ireland
3. Institute of Ecology and Earth Sciences, Department of Botany, University of Tartu, Lai Street 40, 51005, Tartu, Estonia
4. CIDE-CSIC, C. Naquera Km 4.5, Montcada, Valencia, 46113, Spain

Correspondence: Javier Puy, +34618006175, [puy.javi@gmail.com](mailto:puy.javi@gmail.com)

|                                                               |      |                                      |                             |
|---------------------------------------------------------------|------|--------------------------------------|-----------------------------|
| Total word count (excluding summary, references and legends): | 5768 | No. of Figures:                      | 3                           |
| Abstract:                                                     | 201  | No. of Tables:                       | 0                           |
| Introduction:                                                 | 1092 | No. of Supporting Information files: | 9 (Fig. S1-S6, Table S1-S3) |
| Materials and Methods:                                        | 2029 |                                      |                             |
| Results:                                                      | 868  |                                      |                             |
| Discussion:                                                   | 1987 |                                      |                             |
| Acknowledgments:                                              | 73   |                                      |                             |

1 **Abstract**

- 2 • Phenotypic plasticity is essential for organisms to adapt to local ecological  
3 conditions. It is expected that mutualistic interactions, such as arbuscular  
4 mycorrhizal (AM) symbiosis, mediate plant phenotypic plasticity, although it is not  
5 clear to what extent this plasticity may be heritable (i.e., transgenerational  
6 plasticity).
- 7 • We tested for plant plasticity within- and across-generations in response to AM  
8 symbiosis and varying water availability in a full factorial experiment over two  
9 generations, using a genetically uniform line of a perennial apomictic herb,  
10 *Taraxacum brevicorniculatum*. We examined changes in phenotype, performance,  
11 and AM fungal colonization of the offspring throughout plant development.
- 12 • AM symbiosis and water availability triggered phenotypic changes during the life  
13 cycle of plants. Additionally, both triggered adaptive transgenerational effects,  
14 especially detectable during the juvenile stage of the offspring. Water deficit and  
15 absence of AM fungi caused concordant plant phenotypic modifications towards a  
16 “stress-coping phenotype”, both within- and across-generations. AM fungal  
17 colonization of offspring was also affected by the parental environment.
- 18 • AM symbiosis can trigger within-generation and transgenerational plasticity in  
19 terms of functional traits related to resource-use acquisition and AM fungal  
20 colonization. Thus, transgenerational effects of mycorrhizal symbiosis are not  
21 limited to plant fitness, but also improve plants’ ability to cope with environmental  
22 stress.

23 **Key words:**

24 Adaptation, Arbuscular mycorrhizal symbiosis, drought stress, transgenerational effects,  
25 functional traits, AM fungal colonization, phenotypic plasticity

## 26 **Introduction**

27 Abiotic environment and prevailing biotic interactions select for the best-adapted  
28 individuals within and across species in terms of their functional traits (de Bello et al.,  
29 2012; Vellend, 2016). The probability of an individual to withstand this selection may  
30 depend on the nature and severity of the environmental condition, the heritable genetic  
31 variability, but also on its phenotypic plasticity (Price, Qvarnström, & Irwin, 2003).  
32 Phenotypic plasticity is the ability of an organism to modify its performance and trait  
33 expression in response to the environment without altering the DNA sequence (Price et  
34 al., 2003). These changes could operate within the life cycle of the organism subjected  
35 to those conditions (“within-generation plasticity”). Additionally, they may be  
36 transmitted to the following generations via transgenerational effects (also called  
37 “across-generation or transgenerational plasticity”), meaning that the abiotic and biotic  
38 environment experienced by the parental generation influence the phenotype of the  
39 offspring (Herman & Sultan, 2011; Jablonka & Raz, 2009). Recent studies suggest that  
40 transgenerational effects could play a key role in the adaptive response of organisms to  
41 stressors, proven particularly essential during the juvenile stages (Dechaine, Brock, &  
42 Weinig, 2015; Lämke & Bäurle, 2017; Latzel, Janeček, Doležal, Klimešová, &  
43 Bossdorf, 2014; Puy, Carmona, Dvořáková, Latzel, & de Bello, 2020). While the effect  
44 of abiotic conditions on transgenerational plasticity has been repeatedly demonstrated,  
45 little is known about the relative effect of transgenerational effects triggered by biotic  
46 conditions (Alonso, Ramos-Cruz, & Becker, 2019; Puy, de Bello, et al., 2020), and even  
47 less about how they interact with abiotic factors.

48 Together with species’ adaptations to environmental conditions in a site, biotic  
49 interactions are considered key drivers of plant community assembly (de Bello et al.,  
50 2012). Among these, positive interactions such as mycorrhizal symbiosis are essential in  
51 determining, and potentially expanding, the realized niches of species (Gerz, Bueno,  
52 Ozinga, Zobel, & Moora, 2018; Peay, 2016; van der Heijden, Wiemken, & Sanders,  
53 2003). Arbuscular mycorrhizal (AM) symbiosis is a widespread mutualistic association  
54 between plant roots and fungi (from the subphylum Glomeromycotina; Spatafora et al.,  
55 2016). This association is considered mutually beneficial, since, in exchange for  
56 photosynthetic carbon, the AM fungi provide host plants with soil nutrients (mainly  
57 phosphates; Smith & Read, 2008), mitigate abiotic stress (e.g. making the host more  
58 tolerant to drought; Aroca, Porcel, & Ruiz-Lozano, 2012; Augé, Toler, & Saxton, 2015;

59 Doubková, Vlasáková, & Sudová, 2013), and increase resistance to biotic stress,  
60 including pathogens (Pozo, López-Ráez, Azcón-Aguilar, & García-Garrido, 2015;  
61 Smith & Read, 2008). Besides the mutual effects of the AM interaction, the occurrence,  
62 abundance, activity, and the final outcome of the interaction (from positive to negative)  
63 are known to be affected by multiple factors (Hoeksema et al., 2010; N. C. Johnson,  
64 Graham, & Smith, 1997). These factors include intrinsic drivers such as the genotype of  
65 both partners, or the plant developmental stage or sex (Jones & Smith, 2004; Varga &  
66 Kytöviita, 2010). Also, external drivers such as the biotic environment (Šmilauer,  
67 Košnar, Kotlínek, & Šmilauerová, 2020) and/or soil nutrient and water availability  
68 (Martínez-García, de Dios Miranda, & Pugnaire, 2012; Pozo et al., 2015) might be  
69 important. Phosphorus, nitrogen or water deficiency in plants generally, at least when  
70 light is not limiting, stimulates AM symbiosis and influences the abundance of AM  
71 structures (i.e. arbuscules, vesicles, etc.; Martínez-García et al., 2012; Pozo et al., 2015).  
72 However, it remains unclear whether the environmental conditions experienced in  
73 parental generations could affect the functioning of AM symbiosis of the offspring  
74 generation (De Long et al., 2019).

75 As illustrated before, the fitness benefits of plants in AM symbiosis are  
76 relatively well known (Lu & Koide, 1994; Smith & Read, 2008). However, it is unclear  
77 whether these benefits partly operate through phenotypic plasticity induced by the  
78 interaction (Vannier, Mony, Bittebière, & Vandenkoornhuyse, 2015). AM symbiosis  
79 may lead to adaptive changes of plant morphological traits such as modifications in root  
80 architecture (Fusconi, 2014; Goh, Veliz Vallejos, Nicotra, & Mathesius, 2013; Nuortila,  
81 Kytöviita, & Tuomi, 2004) or in traits of the so called “plant economic spectrum”. Since  
82 these traits are associated with a fundamental trade-off between organisms along a  
83 resource-use-acquisition vs. resource-use-conservation gradient, they could be used to  
84 describe the plant resource-use strategy (Díaz et al., 2016). Moreover, it also remains  
85 unclear whether AM symbiosis in a parental generation can trigger similar or different  
86 phenotypic changes in the offspring (i.e. transgenerational effects) and whether these  
87 changes are beneficial (Koide, 2010; Varga, Vega-Frutis, & Kytöviita, 2013). As such,  
88 it is crucial to assess the relative effect of combined biotic and abiotic drivers on within-  
89 generation and transgenerational plasticity, as biotic drivers can potentially modulate  
90 the effect of abiotic stress (González, Dumalasová, Rosenthal, Skuhrovec, & Latzel,  
91 2017; Metz, von Oppen, & Tielbörger, 2015).

92           It should be noted that transgenerational effects can be due to two mutually non-  
93 exclusive mechanisms: environmentally-induced heritable epigenetic modifications in  
94 the offspring (Lämke & Bäurle, 2017), or differences in seed provisioning, seed  
95 nutritional quality or hormonal balance provided by the maternal plants in the embryos  
96 (Dechaine et al., 2015; Germain, Grainger, Jones, & Gilbert, 2019; Herman & Sultan,  
97 2011). In comparison, transgenerational effects originated from embryo modifications  
98 play more significant role during early stages of the development, but they tend to fade  
99 away with time (Latzel, Klimešová, Hájek, Gómez, & Šmilauer, 2010). Most of the  
100 existing evidence demonstrates that having mycorrhizal parents can be beneficial during  
101 the early stages of development of the offspring, i.e. increasing biomass, survival,  
102 growth rate, nutrient content, and seed production (Heppell, Shumway, & Koide, 1998;  
103 Koide, 2010; Varga, 2010; Varga et al., 2013). However, when testing for  
104 transgenerational effects of AM symbiosis, both mechanisms have rarely been  
105 considered (but see Varga et al. (2013) where seed mass was used as a covariate).  
106 Further, Varga & Soulsbury (2017, 2019) have investigated the potential epigenetic  
107 mechanism (i.e., DNA methylation) governing the transgenerational effects of AM  
108 symbiosis. **Error! Bookmark not defined.** Nevertheless, it has not yet been tested  
109 whether the transgenerational effects of AM symbiosis persist further into adult stage,  
110 neither whether these effects influence plant functional traits nor AM fungal  
111 colonization of the offspring.

112           We conducted a two-generation experiment to test for within- and across-  
113 generation plant plasticity in response to AM symbiosis using the perennial apomictic  
114 herb *Taraxacum brevicorniculatum*. Further, in order to test whether both plasticity  
115 types interact with abiotic stress conditions, we included a watering regime treatment.  
116 We then tested whether within- and across-generation plant plasticity were adaptive,  
117 e.g., resulting in an improved ability of the offspring to cope with water limitation.  
118 Additionally, we evaluated the persistence of the transgenerational effects throughout  
119 offspring development by measuring phenotypic traits, performance, and AM fungal  
120 colonization on juvenile and adult offspring.

121

122

123

124

## 125 **Materials and Methods**

126

### 127 *Study material*

128 *Taraxacum brevicorniculatum* Korol. is an obligate apomictic polycarpic perennial  
129 plant (Kirschner, Štěpánek, Černý, De Heer, & van Dijk, 2013). Like most species of  
130 the genus *Taraxacum*, it has a wide ecological niche, accepting all types of soils, pH  
131 and moisture levels (Luo & Cardina, 2012), and forms an active symbiosis with AM  
132 fungi (J. Puy, personal obs. based on a preliminary study). In this study we used  
133 genetically identical seeds collected from a population of plants grown under the same  
134 glasshouse conditions for several generations (collected and genetically identified by  
135 Kirschner *et al.* 2013). This strategy ensured homogeneous genetic and epigenetic  
136 variation in the plant material. Since *T. brevicorniculatum* is an obligate apomictic  
137 species, all seeds produced by a plant are effectively clones, thus enabling the study of  
138 plasticity within and across generations (Puy *et al.*, 2018). In other words, all plants in  
139 the experiments were genetically identical, and after experiencing different conditions  
140 during the parental generation, the offspring only differed in non-genetic (i.e., non-  
141 genetic or epigenetic effects) inherited information.

142

### 143 *Experimental setup*

144 **Parental generation.** In order to induce the potential transgenerational effects related to  
145 mycorrhizal symbiosis and water availability, we first conducted an experiment in  
146 which the parental generation was grown under different conditions in a glasshouse for  
147 three months (April-July 2017). We grew 364 genetically identical individuals of *T.*  
148 *brevicorniculatum* in individual pots (7 x 7 x 18 cm), half inoculated with AM fungi  
149 (AM) and the other half without (NM). In addition, half of these individuals were grown  
150 with sufficient water and half under a water deficit scenario, see below for details.

151 The substrate consisted of 2:1 mixture of sterilized sand and natural soil  
152 collected from a mesic meadow 30 km southeast of Tabor, 660 m a.s.l. (Vysočina  
153 region, Czech Republic, 49.331N, 15.003E) where *Taraxacum sect. Ruderalia* was

154 present. The natural soil was firstly sieved using a 4 mm mesh sized sieve to remove  
155 any stones, macrofauna, or rhizomes from the soil. For the AM treatment the natural  
156 soil containing indigenous microbial community was used; whereas for the NM  
157 treatment the same soil was sterilized via  $\gamma$  irradiation (>25kGy dose; McNamara,  
158 Black, Beresford, & Parekh, 2003). To compensate for the loss of other soil microbes  
159 due to the sterilization, a microbial wash was also added (Liang et al., 2015). We  
160 obtained the microbial wash by blending 5kg of non-sterilized soil in 10 l water and  
161 filtering the solution through 20 $\mu$ m pore-size filter paper (Whatman® quantitative filter  
162 paper, Grade 41) broadly following van der Heijden *et al.*, (1998). Gamma-sterilization  
163 did not change neither the C nor the N chemical composition of the soil compared to the  
164 non-sterilized soil (Fig. S1).

165 The AM and NM treatments were factorially combined with two levels of water  
166 availability. Half of the individuals were subjected to cycles of water deficit (simulating  
167 drought stress; W-), while the other half were watered regularly from the bottom  
168 ensuring the pot surface was always wet (control; W+). The water deficit treatment  
169 included periodic exclusion of watering until when 50% of the individuals had wilted  
170 leaves followed by one-week recovery in control conditions. By the end of the  
171 experiment, the water deficit treatment comprised two water deficit pulses (the first  
172 started 12<sup>th</sup> of May and the second 15<sup>th</sup> of June) that lasted three weeks plus one-week  
173 recovery each.

174 Prior to the establishment of the experiment, seeds were surface sterilised by  
175 immersion in 0.5% sodium hypochlorite solution (commercial bleach) for 20 minutes to  
176 avoid inoculation via seeds, and then germinated in Petri dishes. After 10 days of  
177 germination, the seedlings were transplanted individually into the pots specified above,  
178 with 91 replicates per treatment. After three months we harvested all the plants except  
179 15 individuals from each of the four treatment combinations (AM W+, AM W-, NM  
180 W+, NM W-). These plants were kept for four more months in ambient conditions  
181 (water control condition), with a 12 h (20°C) / 12 h (10°C) light/darkness-and-  
182 temperature regime and with addition of fertilizer (Kristalon; NPK 15–5–30 + 3Mg +  
183 5S) at the concentration of 300 ppm once per month, in order to promote seed  
184 production. Relocating the plants to more benign conditions was required to promote  
185 seed production especially for the non-mycorrhizal plants which, at the time of harvest,

186 had not flowered yet. Then, seeds of each plant were collected, and after measuring the  
187 average seed mass per plant, were stored in cold (2-4 °C).

188 **Offspring experiment.** A similar glasshouse experiment to the one described above  
189 was repeated the following year (April-August 2018) with the seeds produced by the  
190 parental generation in the first experiment. The aim of the offspring experiment was to  
191 test for adaptive transgenerational effects of AM symbiosis and water availability on the  
192 offspring at their juvenile and the adult stages. We tested this with a full factorial design  
193 where the offspring plants from each of the four parental treatments were exposed again  
194 to the four possible conditions (AM W+, AM W-, NM W+, NM W-). Thus, the  
195 offspring experimental design resulted in 16 combinations: two parental mycorrhizal  
196 inoculations (Par. M: AM/NM) x two parental water availability levels (Par. W: W+/W-  
197 ) x two offspring mycorrhizal fungal inoculations (Off. M: AM/NM) x two offspring  
198 water availability levels (Off. W: W+/W-). Since the seed mass of AM parents was on  
199 average lower than that of NM parents (see below *Results of parental generation*, Table  
200 S1), and seed provisioning could be a potential mechanism of transgenerational effects  
201 (Herman & Sultan, 2011). We controlled for it by classifying seeds from all parental  
202 treatments into 5 size categories. Then, we took the same number of seeds from each  
203 size-group in each parental treatment, resulting in a similar distribution of seed sizes  
204 between parental treatments. Thus, the offspring experimental design finally resulted in  
205 the 16 combinations x 5 seed size categories x 8 seedlings = 640 pots (Fig. S2).

206 Plants were harvested at two different developmental stages. Half of the  
207 offspring plants were harvested 1.5 months after planting, at their juvenile stage; and the  
208 rest of the replicants were harvested five months after planting, at their adult stage  
209 before they flowered. Pots, substrate and watering regime were the same as in the  
210 parental experiment to ensure the most similar conditions. However, the first water  
211 deficit pulse in the offspring generation lasted four weeks instead of three (first one  
212 started the 25<sup>th</sup> of April and the second one, the 1<sup>st</sup> of June) to ensure comparable effects  
213 on plants physiology (i.e., percentage of plants with wilted leaves). To facilitate the  
214 application of the treatments, four replicates of a parental treatment were placed in  
215 parallel, one in each offspring treatment (Fig. S2).

216

217



218

219 *Measured traits*

220 We measured a set of important plant traits in both generations. For each plant in the  
221 parental generation we measured survival, total dry biomass (aerial plus root biomass),  
222 seed output (i.e., number of seeds) and seed mass at the time of harvest. For five  
223 randomly chosen plants per treatment, we measured C, N and P content of the seeds,  
224 considered to be reliable indicators of seed reserve materials (Toorop et al., 2012). Total  
225 C and N content were determined by dry combustion using an elemental analyser  
226 (CHNS Elemental Analyzer vario MICRO cube, Elementar Analysensysteme GmbH,  
227 Germany). Total P was determined by flow injection analysis.

228 Additionally, we measured several above- and belowground vegetative plant traits. For  
229 each plant, two leaves were scanned for leaf area and weighed for fresh mass and dry  
230 mass after drying at 60° C (48h) to estimate specific leaf area (SLA; leaf area per dry  
231 mass, mm<sup>2</sup>/mg) and leaf dry matter content (LDMC; leaf dry mass per leaf fresh mass,  
232 mg/mg). Roots were carefully extracted, washed and a subsample of roots (6 cm<sup>2</sup>) was  
233 scanned at 600 dpi with an Epson Perfection 4990 scanner. Total root length, average  
234 root diameter (mm), and distribution of root length in different diameter classes were  
235 determined by using the image analysis software WinRHIZO Pro, 2008 (Regent  
236 Instruments Inc., Quebec, Canada). After scanning, the root subsample and the rest of  
237 the root system were dried for 48 h at 60 °C and weighed. We used these measurements  
238 to estimate specific root length (SRL; root length per dry mass, m/g), and fine roots  
239 percentage (root length with a diameter < 0.5mm per total root length). Further, we  
240 estimated root biomass allocation (i.e., root mass factor; RMF; root biomass per total  
241 biomass, g/g) after drying the remaining radicular part at 60° C (48h).

242 For each plant in the offspring generation, at the time of the respective harvest  
243 (i.e., juvenile and adult offspring harvest), we measured total dry biomass (aerial plus  
244 root biomass), and the same above- and belowground vegetative traits as described  
245 above. Additionally, we analyzed the content of C, N and P in the leaves of two  
246 randomly chosen plants from the juvenile stage and eight plants from the adult stage per  
247 treatment, following the methods described above. The root subsamples were stained  
248 with Chlorazol Black according to the protocol by Šmilauer, Košnar, Kotlínek, &  
249 Šmilauerová (2020). We quantified the AM fungal colonization by measuring the

250 percentage of root length colonized (%RLC) by AM fungal structures (arbuscules,  
251 vesicles and hyphae). Magnified intersection method (McGonigle, Miller, Evans,  
252 Fairchild, & Swan, 1990) was used with 400 x magnification using a light microscope  
253 with graticule inserted into the eyepiece. All the specific structures of AM fungi  
254 (arbuscules, vesicles and hyphae) that intersected the vertical line (i.e., root in horizontal  
255 position) were counted for at least 100 intersections per root sample. We further  
256 calculated the arbuscule:vesicle ratio (relative abundance of arbuscules per vesicles),  
257 suggested as an indicator of the fungal activity status and the relative cost or benefit of  
258 the fungus to the host plant (Braunberger, Miller, & Peterson, 1991; Titus & Lepš,  
259 2000).

260

### 261 *Statistical analysis*

262 All analyses were carried out using R v3.2.3 (R Core Team 2016) with  $\alpha=0.05$  as  
263 significance level. In the parental generation, the effects of the mycorrhizal inoculation  
264 (two levels), the water availability (two levels), and their interaction were analysed by  
265 using linear effects models. Plant total biomass was always log-transformed.

266 In the offspring generation, individuals were grouped into sixteen different  
267 treatments (as a result of the combination of four factors with two levels each)  
268 depending on parental and offspring conditions. Two of the factors corresponded to  
269 parental conditions: mycorrhizal fungal inoculation treatment (Par. M: AM/NM), and  
270 water availability treatment (Par. W: W+/W-). The other two factors corresponded to  
271 offspring conditions: mycorrhizal fungal inoculation treatment (Off. M: AM/NM) and  
272 water availability treatment (Off. W: W+/W-). We analysed the effects of parental and  
273 offspring conditions on plant traits of the offspring using linear effects models where  
274 the four experimental factors (two parental, and two offspring conditions) and all their  
275 interactions were used as fixed effects. Additionally, in order to control for differences  
276 between parental treatments in seed provisioning or quality provided by the maternal  
277 plants (Herman & Sultan, 2011; Toorop et al., 2012), we included seed mass and seed  
278 stoichiometry as covariates in the model (i.e. as fixed effects). The seed stoichiometry  
279 values were computed assigning the scores of the first axis of a principal components  
280 analysis (PCA) that combined the C, N and P chemical composition of the seeds and  
281 absorbed 60% of the variation. Seed stoichiometry was not correlated with seed mass

282 (Pearson correlation = -0.18,  $P = 0.44$ ). Any effect of the parental conditions: either  
283 direct (Par. M or Par. W) or in interaction with the offspring conditions (Off. x Par.) that  
284 remained significant after removing the linear part of the maternal investment (seed  
285 mass and stoichiometry) was considered a transgenerational effect.

286 For the analysis of the effect of parental and offspring treatments on AM fungal  
287 colonization and arbuscule:vesicle ratio of the offspring, we used identical models, but  
288 excluding the offspring mycorrhizal inoculation factor (Off. M) from the model due to  
289 the lack of AM fungal colonization in the NM plants.

290 Additionally, we checked for correlations between plant traits and measures of  
291 AM fungal colonization to check which plant traits show plasticity in response to AM  
292 fungal colonization and to examine whether these changes could partially explain the  
293 benefits of AM symbiosis to the host plant, meaning that they are adaptive.

294

## 295 **Results**

296

### 297 *Parental generation*

298 In the parental generation, the water deficit treatment decreased *T. brevicorniculatum*  
299 total plant biomass and survival, but only on NM plants, with no effect on AM plants  
300 (Fig. S3a,b; Table S1). AM fungal inoculation increased plant growth, survival and  
301 reproductive investment (i.e., number of seeds per unit plant biomass), with no effect on  
302 the total number of seeds produced per plant (Fig. S3, Table S1). Additionally, seeds of  
303 AM plants were lighter than the ones of NM plants, and with higher N, P and C  
304 contents, although only the latter one was significant (Fig. S3, Table S1). Nevertheless,  
305 the seed macronutrients stoichiometry, i.e. C:N:P ratios, did not differ between AM and  
306 NM plants (Fig. S3, Table S1).

307

### 308 *Offspring plant traits*

309 In the juvenile offspring, the majority of the measured plant traits were strongly affected  
310 by both offspring treatments (offspring mycorrhizal fungal inoculation treatment, Off.

311 M; and offspring water availability treatment, Off. W), except leaf C:N ratio and SRL  
312 that were affected only by the mycorrhizal and by the water treatment respectively (Fig.  
313 1 and Table S2). In general, plants under water deficit and absence of AM symbiosis  
314 were smaller, with higher biomass allocation into the roots (i.e., higher RMF), ticker  
315 leaves and roots (lower SLA and SRL), and lower P content and C:N ratio on leaves  
316 (Fig. 1 and Table S2).

317         After removing the effect of seed mass and seed stoichiometry (maternal  
318 investment effects), we found transgenerational effects (i.e., offspring plants were  
319 affected by the parental conditions) in most of the traits (i.e., seven out of nine, Table  
320 S2). When comparing the effects of both parental treatments (Par. M and Par. W), we  
321 found that parental mycorrhizal inoculation triggered transgenerational effects in all  
322 measured plant traits, while the parental water treatment induced changes only on three  
323 traits and generally in interaction with the offspring conditions (Fig. 1; Table S2).  
324 Juvenile offspring of mycorrhizal parents (Par. M) had in general lower biomass, lower  
325 allocation to the roots (lower RMF) but thinner roots (% Fine roots), and higher LDMC  
326 and leaf P content (Fig. 1a,b,c,d,g and Table S2). Except for biomass and LDMC, the  
327 direction of the response to the parental treatment was concordant with the response to  
328 the offspring treatment. For example, mycorrhizal offspring showed lower RMF and  
329 more P content on leaves, and these effects were further pronounced when offspring  
330 also had mycorrhizal parents (Fig. 1b,d and Table S2). Although in interaction with  
331 other factors, we found transgenerational effects induced by the parental water  
332 treatment. Mycorrhizal offspring of parents under water deficit (Par. W) increase the  
333 SRL and slim down the roots, when also had mycorrhizal parents (Par. W x Off. M x  
334 Par. M Fig. 1f,g and Table S2).

335         At the adult stage, the offspring treatments (Off. M and Off. W) were still the  
336 main drivers of plant plasticity (Fig. 2 and Table S3) and generally the responses of the  
337 traits were in the same direction than those during juvenile stage (leaf P content and  
338 total biomass; Fig. 2 and Table S3). Nonetheless, LDMC plasticity in response to  
339 offspring conditions (Off. M and Off. W) reversed compared with the juvenile stage.  
340 The offspring with water deficit and absence of AM symbiosis had higher LDMC  
341 during the juvenile stage, but lower LDMC during the adult stage (Fig. 1b and Fig. 2b).  
342 Similar reversed response happened in RMF only when offspring were with water  
343 deficit. Also, root traits that did not respond to the offspring treatments during juvenile

344 stage, started responding during adult stage. At the latter stage, plants with water deficit  
345 and non-mycorrhizal plants had thinner and more absorptive roots (higher SRL and %  
346 Fine roots; Fig. 2f, g and Table S3). Finally, at this stage, we still detected significant  
347 transgenerational effects on plant traits, but only on RMF (Fig. 2b and Table S3). Adult  
348 offspring of mycorrhizal parents (Par. M) still had lower allocation to the roots (lower  
349 RMF).

350

### 351 *Offspring AM fungal colonization*

352 The water availability treatments (Off. W) modified the AM fungal colonization of the  
353 juvenile offspring. Plants grown with water deficit cycles had less root length colonized  
354 by AM fungi (lower %RLC) but had higher arbuscule:vesicle ratio than control plants  
355 (Fig. 3a, b and Table S2). Additionally, AM fungal colonization was affected by the  
356 parental treatments only when offspring plants had water deficit (Off. W x Par. W;  
357 Table S2). Offspring of parents that did not experience water deficit had higher %RLC  
358 than the ones of parents that had experienced water deficit (Fig. 3a; Table S2). For the  
359 arbuscule:vesicle ratio we did not detect significant transgenerational effects (Fig. 3b,  
360 Table S2 and Fig. S4).

361 During the adult stage, we found no significant difference in %RLC between the  
362 offspring water availability treatments (Off. W), although there was a lower  
363 arbuscule:vesicle ratio in plants with water deficit, reversed response compared with  
364 what happened during the juvenile stage (Fig. 3c, d, Table S3 and Fig. S4). Also, at this  
365 stage we found that AM fungal colonization was affected by the parental treatments  
366 only when the offspring plants grew with water deficit cycles. The adult offspring of  
367 mycorrhizal parents (Off. W x Par. M) had higher %RLC than the ones of non-  
368 mycorrhizal parents (Fig 3c; Table S3).

369

## 370 **Discussion**

371 In this study we show the importance of AM symbiosis in triggering phenotypic  
372 plasticity in plants, both during their life cycle and in following generations. Such  
373 phenotypic changes can improve the ability of individuals to cope with environmental  
374 stress and likely increase the species' realized niche. Here we show that mycorrhizal

375 symbiosis could specifically trigger morphological changes related to resource use and  
376 resource acquisition strategies within-generations and to succeeding generations.  
377 Further, we provide evidence that AM fungal colonization of the offspring could be also  
378 affected by parental conditions. Transgenerational effects of mycorrhizal symbiosis and  
379 water availability were not caused by differences in the quality and resources provided  
380 in the seed (Herman & Sultan, 2011), pointing to heritable epigenetic mechanisms as  
381 potential factor transmitting and mediating these effects across generations.

382

383 *Within-generational plasticity on offspring traits is development specific*

384 The strong response of plants of *T. brevicorniculatum* to the conditions experienced  
385 during their life cycle (i.e., offspring mycorrhizal fungal inoculation and water  
386 availability treatments) shows the high level of plasticity of this plant species. However,  
387 we found that the response to these conditions differed in juvenile and adult phases,  
388 suggesting specific plant plasticity at different developmental stages (Coleman,  
389 McConnaughay, & Ackerly, 1994).

390 As expected, measurements of different fitness-related characteristics (i.e. plant  
391 nutrition and growth) suggest that AM symbiosis improved plant performance and  
392 mitigated water deficit, since the benefit of being mycorrhizal increased with decreasing  
393 water supply (Aroca et al., 2012; Augé et al., 2015; Doubková et al., 2013). First,  
394 mycorrhizal fungal inoculation dramatically increased leaf P content at both  
395 developmental stages of the offspring (Fig. 1d and Fig. 2d). These results reflect that  
396 mycorrhizal plants had better nutritional supply – were provided with important  
397 nutrients such as P (Doubková et al., 2013; Lu & Koide, 1994) – despite being in water  
398 deficit conditions. Probably because of this, mycorrhizal fungal inoculation also  
399 increased growth (i.e., plant biomass) of plant individuals in water deficit conditions to  
400 similar levels than growth of non-stress plants. However, this benefit was more  
401 pronounced in adult offspring than in juveniles (Fig. 2a vs Fig. 1a), probably due to a  
402 greater cost/benefit ratio during the juvenile stage (N. C. Johnson et al., 1997).

403 In both developmental stages, mycorrhizal fungal inoculation and water  
404 availability treatments induced significant changes in multiple plant phenotypic traits  
405 related to the resource-use strategy of the plant (also called plant economic spectrum;

406 Díaz et al., 2016), including both below- and aboveground traits (Fusconi, 2014; Goh et  
407 al., 2013; Nuortila et al., 2004). However, traits seem to respond differently depending  
408 on the developmental stage of the plant. Plant phenotypic plasticity triggered by AM  
409 fungal inoculation could be either direct (i.e., caused in reaction to AM fungal  
410 infection), or indirect by a lack of phenotypic plasticity in reaction to water deficit, since  
411 the AM fungi increase the tolerance of host plants to it (Goh et al., 2013; Maherali,  
412 2014).

413         During the juvenile stage water availability and mycorrhizal fungal inoculation  
414 triggered independent and additive trait plasticity in the same direction (Table S2).  
415 Similar to findings of Shumway & Koide (1994), under reduced water availability  
416 and/or absence of AM fungi, plants shifted towards more resource-conservative  
417 phenotype based on the plant economics spectrum framework (Díaz et al., 2016). This  
418 phenotype is characterized by having greater belowground biomass allocation (RMF),  
419 less photosynthetic but more water-use efficient leaves (greater LDMC and C:N ratio,  
420 lower SLA) and thicker and more resistant roots (lower SRL) (Fig. 1 and Fig. S5).  
421 These traits are expected to be beneficial when resources are scarce, since they are  
422 associated with longer lifespan and enhance water use efficiency of the plant under  
423 water stress (Díaz et al., 2016). Thus, the plastic response towards a conservative  
424 phenotype could improve *T. brevicorniculatum* ability to cope with water deficit. In this  
425 case, AM symbiosis seems to induce direct plant trait plasticity, and not indirectly by a  
426 lack of reaction to water deficit. Accordingly, the host plant with more root length  
427 colonized by AM fungal (%RLC), had thinner roots, and higher SLA (Fig. S5a).

428         During the adult stage, the direction of plasticity changed compared to the  
429 response at the juvenile stage. In response to reduced water availability and/or absence  
430 of AM fungi plants shifted towards more resource-acquisitive phenotype. The plants  
431 decreased LDMC and C:N ratio and increased their SRL and percentage of fine roots,  
432 reflecting an adaptive phenotypic plasticity that improved resource uptake and  
433 compensated for the lack of AM symbiosis and the involvement of extraradical  
434 mycelium in plant resource uptake (Fusconi, 2014; Goh et al., 2013; Pozo et al., 2015).  
435 At this stage, the plasticity triggered by AM symbiosis seems to be indirect and caused  
436 by a lack of physiological reaction of the plant to water deficit (i.e., it induced the same  
437 phenotypic changes as the water control condition), because AM symbiosis have  
438 increased plant tolerance against stress. This different responses depending on

439 developmental stage could explain why previous studies found variable effects of  
440 mycorrhizal symbiosis on plant phenotype (D. Johnson, Martin, Cairney, & Anderson,  
441 2012; Nuortila et al., 2004). Nevertheless, at both stages we found strong positive  
442 correlation between root length colonized by AM fungal (%RLC) and SRL and strong  
443 negative one between %RLC and root diameter (Fig. S5b).

444

#### 445 *Transgenerational effects on offspring performance and phenotype*

446 Several studies had already shown that offspring from mycorrhizal parents can have  
447 greater fitness, reflected in higher biomass, survival, growth rate, and seed production  
448 (Heppell et al., 1998; Koide, 2010; Varga et al., 2013). We partially confirmed this in  
449 this study. We found that offspring of mycorrhizal parents had higher leaf P content  
450 than those of non-mycorrhizal parents (Fig. 1d), suggesting that mycorrhizal symbiosis,  
451 besides directly providing soil nutrients to host plants, could also increase offspring's  
452 nutrient uptake via transgenerational effects. However, in terms of biomass, we  
453 observed that indeed having non-mycorrhizal parents was beneficial (Fig. 1a). This  
454 contrasting result in biomass was probably due to the fact that, unlike previous  
455 evidence, we experimentally after controlling the effect of seed mass and stoichiometry  
456 (Dechaine et al., 2015; Germain et al., 2019; Herman & Sultan, 2011; but see Varga &  
457 Kytöviita, 2010). Also it could have further allowed us to detected underlying  
458 transgenerational effects probably controlled by epigenetic or hormonal mechanisms  
459 (Herman & Sultan, 2011; Rottstock, Kummer, Fischer, & Joshi, 2017; Varga &  
460 Soulsbury, 2017). One way to confirm whether these effects were only epigenetically  
461 controlled would be to modify the epigenetic signature of the plants via application of a  
462 demethylation agent (Puy, de Bello, et al., 2020; Puy et al., 2018). However, it should  
463 be first tested whether the demethylation application does not harm the AM fungal  
464 community.

465         Moreover, we found transgenerational effects in offspring traits linked with the  
466 resource use and exploitation strategy of the plant (Díaz et al., 2016), with  
467 transgenerational plasticity of the offspring being concordant with the within-  
468 generational response to the treatments. Plant traits shifted towards a “stress-coping  
469 phenotype under water deficit and absence of AM symbiosis during their life cycle (i.e.,  
470 more conservative phenotype: increased the RMF and decrease SRL). Additionally,



471 offspring individuals became even more conservative when their parents were under  
472 those stressful conditions (i.e., water deficit and absence of AM symbiosis; Fig. 1).  
473 Thus, the transgenerational effects reinforced trait plasticity when individuals were  
474 grown in the same conditions of their parents. This suggests a “stress memory” effect  
475 that could improve the ability of plants to cope with predictable environment across  
476 generations. The higher biomass found in offspring of non-mycorrhizal parents could  
477 partly be a consequence of this adaptive heritable phenotypic plasticity, that enhance  
478 their water use efficiency despite the environment they grow on.

479         Even though both abiotic and biotic parental environments seemed to trigger  
480 transgenerational effects, we found that mycorrhizal fungal inoculation affected plant  
481 traits more than water availability (Fig. 1 and Table S2). Since *T. brevicorniculatum* has  
482 a wide ecological niche – it grows well under different water availability conditions  
483 (Luo & Cardina, 2012) – it is likely that water is a less crucial stressor for this species,  
484 and likewise that the transgenerational effects due to water availability could have been  
485 not evolutionary nor ecological strongly constraining (Rendina González, Preite,  
486 Verhoeven, & Latzel, 2018). Also, it is important to emphasize that we found that  
487 transgenerational effects on phenotype were expressed early on the ontogeny (Fig. 1)  
488 and faded away over offspring life development (Fig. 2). This result reinforces the idea  
489 of transgenerational effects as an important factor promoting adaptation to repeated  
490 ecological conditions, especially during juvenile stages and establishment of  
491 communities (Dechaine et al., 2015; Latzel et al., 2014). Also, even though  
492 transgenerational effects are likely to fade away with time, the effects associated to  
493 differences in the seeds might fade away even faster (Latzel et al., 2010) as happened in  
494 our case (Table S2 and S3).

495

#### 496 *Within- and transgenerational effect on AM fungal colonization*

497 As expected, the environmental factors experienced by offspring during their life cycle  
498 (Off W) affected the offspring AM fungal colonization. Contrary to our expectation  
499 (Martínez-García et al., 2012; Pozo et al., 2015), water deficiency did not stimulate root  
500 AM fungal colonization (since %RLC decreased). However, the proportion of  
501 arbuscules:vesicles increased in offspring with water deficit, suggesting that water

502 deficiency can stimulate AM fungal activity, since the arbuscules are the main  
503 structures where resource exchange takes place.

504           Moreover, we found that AM fungal colonization of the offspring could be  
505 influenced by the conditions experienced by the host plant parental generation. To our  
506 knowledge, this is the first study that shows transgenerational effects on AM fungal  
507 colonization (but see De Long et al., 2019 for differences in AMF structures).  
508 Specifically, we observed that only under water deficit conditions, the offspring of  
509 parents that experienced water scarcity had lower AM fungal colonization. Although  
510 this appears to contradict our initial hypothesis that resource scarcity (i.e., water deficit  
511 and NM parental treatments) would stimulate AM symbiosis of the offspring, we must  
512 note that offspring from water deficit and NM parents compensated by having increased  
513 root biomass. This means that this offspring had in total more roots colonized and  
514 greater number of arbuscules per individual than offspring from parents under ambient  
515 water conditions (see the calculations made by relativizing to the total root biomass of  
516 the plant – i.e., root biomass x %RLC – Fig. S6). Thus, we conclude that the result in  
517 general still supports the notion that transgenerational effects modify offspring towards  
518 the “stress-coping phenotype” stimulating the establishment and activity of the AM  
519 symbiosis.

520           As also found for plant traits, the AM fungal colonization of the offspring was  
521 influenced by the parental conditions still during adult stage. This suggests that  
522 transgenerational effects could influence plant–AM fungi relationship and persist  
523 further than just the establishment and early stages of the symbiosis. At the adult stage,  
524 %RLC was affected by the parental mycorrhizal status, so that offspring from  
525 mycorrhizal parents had higher %RLC under water deficit. These results suggest that  
526 mycorrhizal symbiosis could be promoted in the offspring when the parental generation  
527 had experienced mycorrhizal symbiosis.

528

## 529 **Conclusions**

530 We found that mycorrhizal symbiosis, alone and in combination with water availability,  
531 triggered phenotypic changes within and across generations on plant performance and  
532 AM fungal colonization. Water deficits and absence of AM fungi triggered concordant  
533 plant phenotypic plasticity, towards a stress-coping phenotype, both within- and across

534 generations. This reflects an adaptive epigenetic mechanism that promotes rapid  
535 adaptation, and probably improves the ability of the species to cope with water deficit.  
536 In a context where the importance of individual and intraspecific variation of  
537 mycorrhizal plants and fungi in ecosystems is increasingly acknowledged (D. Johnson  
538 et al., 2012), our study provides evidence of a mechanism of variation that has been  
539 neglected so far: transgenerational plasticity. These plastic changes confer competitive  
540 advantages to the next generation. Importantly, we show that transgenerational effects  
541 remained significant even after controlling by the differences in seed provisioning and  
542 nutritional quality stocked by the mother, pointing to other mechanisms such as  
543 heritable epigenetic mechanisms as potential mediators and transmitters of these effects  
544 across generations.

545

#### 546 **Acknowledgments**

547 We thank M. Applová, T. Jairus and N. G. Medina for technical assistance and N.  
548 Plowman for English revision. This research was financially supported by the Czech  
549 Science Foundation grant GACR (Grant No. GA17-11281S) and the European Union  
550 through the European Regional Development Fund. IH, MÖ, CPC and MM received  
551 support by grants from the Estonian Research Council (PSG293, PUT1170) and by the  
552 European Regional Development Fund (Centre of Excellence EcolChange).

553

#### 554 **Author contribution**

555 JP, CPC, IH, MÖ, FdB and MM designed the research; JP performed the experiments;  
556 JP and CPC analysed the data; JP wrote the main manuscript. All authors contributed  
557 substantially to revisions and gave final approval for publication.

558

#### 559 **Data availability**

560 The data that support the findings of this study will be available on Figshare repository  
561 with acceptance.

562

#### 563 **References:**

- 564 Alonso, C., Ramos-Cruz, D., & Becker, C. (2019). The role of plant epigenetics in  
565 biotic interactions. *New Phytologist*, *221*(2), 731–737. doi: 10.1111/nph.15408
- 566 Aroca, R., Porcel, R., & Ruiz-Lozano, J. M. (2012). Regulation of root water uptake  
567 under abiotic stress conditions. *Journal of Experimental Botany*, *63*(1), 43–57. doi:  
568 10.1093/jxb/err266
- 569 Augé, R. M., Toler, H. D., & Saxton, A. M. (2015). Arbuscular mycorrhizal symbiosis  
570 alters stomatal conductance of host plants more under drought than under amply  
571 watered conditions: a meta-analysis. *Mycorrhiza*, *25*(1), 13–24. doi:  
572 10.1007/s00572-014-0585-4
- 573 Braunberger, P. G., Miller, M. H., & Peterson, R. L. (1991). Effect of phosphorus  
574 nutrition on morphological characteristics of vesicular–arbuscular mycorrhizal  
575 colonization of maize. *New Phytologist*, *119*(1), 107–113. doi: 10.1111/j.1469-  
576 8137.1991.tb01013.x
- 577 Coleman, J. S., McConnaughay, K. D. M., & Ackerly, D. D. (1994). Interpreting  
578 phenotypic variation in plants. *Trends in Ecology & Evolution*, *9*(5), 187–191. doi:  
579 10.1016/0169-5347(94)90087-6
- 580 de Bello, F., Price, J. N., Münkemüller, T., Liira, J., Zobel, M., Thuiller, W., ... Pärtel,  
581 M. (2012). Functional species pool framework to test for biotic effects on  
582 community assembly. *Ecology*, *93*(10), 2263–2273. doi: 10.1890/11-1394.1
- 583 De Long, J. R., Semchenko, M., Pritchard, W. J., Cordero, I., Fry, E. L., Jackson, B. G.,  
584 ... Bardgett, R. D. (2019). Drought soil legacy overrides maternal effects on plant  
585 growth. *Functional Ecology*, *00*, 1– 11. doi: 10.1111/1365-2435.13341
- 586 Dechaine, J. M., Brock, M. T., & Weinig, C. (2015). Maternal environmental effects of  
587 competition influence evolutionary potential in rapeseed (*Brassica rapa*).  
588 *Evolutionary Ecology*, *29*(1), 77–91. doi: 10.1007/s10682-014-9735-6
- 589 Díaz, S., Kattge, J., Cornelissen, J. H. C., Wright, I. J., Lavorel, S., Dray, S., ... Gorné,  
590 L. D. (2016). The global spectrum of plant form and function. *Nature*, *529*(7585),  
591 167–171. doi: 10.1038/nature16489
- 592 Doubková, P., Vlasáková, E., & Sudová, R. (2013). Arbuscular mycorrhizal symbiosis  
593 alleviates drought stress imposed on *Knautia arvensis* plants in serpentine soil.

- 594 *Plant and Soil*, 370(1–2), 149–161. doi: 10.1007/s11104-013-1610-7
- 595 Fusconi, A. (2014). Regulation of root morphogenesis in arbuscular mycorrhizae: What  
596 role do fungal exudates, phosphate, sugars and hormones play in lateral root  
597 formation? *Annals of Botany*, 113(1), 19–33. doi: 10.1093/aob/mct258
- 598 Germain, R. M., Grainger, T. N., Jones, N. T., & Gilbert, B. (2019). Maternal  
599 provisioning is structured by species' competitive neighborhoods. *Oikos*, 128(1),  
600 45–53. doi: 10.1111/oik.05530
- 601 Gerz, M., Bueno, C. G., Ozinga, W. A., Zobel, M., & Moora, M. (2018). Niche  
602 differentiation and expansion of plant species are associated with mycorrhizal  
603 symbiosis. *Journal of Ecology*, 106(1), 254–264. doi: 10.1111/1365-2745.12873
- 604 Goh, C.-H., Veliz Vallejos, D. F., Nicotra, A. B., & Mathesius, U. (2013). The Impact  
605 of Beneficial Plant-Associated Microbes on Plant Phenotypic Plasticity. *Journal of*  
606 *Chemical Ecology*, 39(7), 826–839. doi: 10.1007/s10886-013-0326-8
- 607 González, A. P. R., Dumalasová, V., Rosenthal, J., Skuhrovec, J., & Latzel, V. (2017).  
608 The role of transgenerational effects in adaptation of clonal offspring of white  
609 clover (*Trifolium repens*) to drought and herbivory. *Evolutionary Ecology*, 31(3),  
610 345–361. doi: 10.1007/s10682-016-9844-5
- 611 Heppell, K. B., Shumway, D. L., & Koide, R. T. (1998). The effect of mycorrhizal  
612 infection of *Abutilon theophrasti* on competitiveness of offspring. *Functional*  
613 *Ecology*, 12(2), 171–175. doi: 10.1046/j.1365-2435.1998.00188.x
- 614 Herman, J. J., & Sultan, S. E. (2011). Adaptive Transgenerational Plasticity in Plants:  
615 Case Studies, Mechanisms, and Implications for Natural Populations. *Frontiers in*  
616 *Plant Science*, 2, 102. Retrieved from  
617 <http://journal.frontiersin.org/article/10.3389/fpls.2011.00102/abstract>
- 618 Hoeksema, J. D., Chaudhary, V. B., Gehring, C. A., Johnson, N. C., Karst, J., Koide, R.  
619 T., ... Umbanhowar, J. (2010). A meta-analysis of context-dependency in plant  
620 response to inoculation with mycorrhizal fungi. *Ecology Letters*, 13(3), 394–407.  
621 doi: 10.1111/j.1461-0248.2009.01430.x
- 622 Jablonka, E., & Raz, G. (2009). Transgenerational Epigenetic Inheritance: Prevalence,  
623 Mechanisms, and Implications for the Study of Heredity and Evolution. *The*

- 624 *Quarterly Review of Biology*, 84(2), 131–176. doi: 10.1086/598822
- 625 Johnson, D., Martin, F., Cairney, J. W. G., & Anderson, I. C. (2012). The importance of  
626 individuals: Intraspecific diversity of mycorrhizal plants and fungi in ecosystems.  
627 *New Phytologist*, 194(3), 614–628. doi: 10.1111/j.1469-8137.2012.04087.x
- 628 Johnson, N. C., Graham, J. H., & Smith, F. A. (1997). Functioning of mycorrhizal  
629 associations along the mutualism-parasitism continuum. *New Phytologist*, 135(4),  
630 575–586. doi: 10.1046/j.1469-8137.1997.00729.x
- 631 Jones, M. D., & Smith, S. E. (2004). Exploring functional definitions of mycorrhizas:  
632 Are mycorrhizas always mutualisms? *Canadian Journal of Botany*, 82(8), 1089–  
633 1109. doi: 10.1139/b04-110
- 634 Kirschner, J., Štěpánek, J., Černý, T., De Heer, P., & van Dijk, P. J. (2013). Available  
635 ex situ germplasm of the potential rubber crop *Taraxacum koksaghyz* belongs to a  
636 poor rubber producer, *T. brevicorniculatum* (Compositae-Crepidinae). *Genetic  
637 Resources and Crop Evolution*, 60(2), 455–471. doi: 10.1007/s10722-012-9848-0
- 638 Koide, R. T. (2010). Mycorrhizal Symbiosis and Plant Reproduction. In *Arbuscular  
639 Mycorrhizas: Physiology and Function* (pp. 297–320). doi: 10.1007/978-90-481-  
640 9489-6\_14
- 641 Lämke, J., & Bäurle, I. (2017, December 27). Epigenetic and chromatin-based  
642 mechanisms in environmental stress adaptation and stress memory in plants.  
643 *Genome Biology*, Vol. 18, p. 124. doi: 10.1186/s13059-017-1263-6
- 644 Latzel, V., Janeček, Š., Doležal, J., Klimešová, J., & Bossdorf, O. (2014). Adaptive  
645 transgenerational plasticity in the perennial *Plantago lanceolata*. *Oikos*, 123(1), 41–  
646 46. doi: 10.1111/j.1600-0706.2013.00537.x
- 647 Latzel, V., Klimešová, J., Hájek, T., Gómez, S., & Šmilauer, P. (2010). Maternal effects  
648 alter progeny's response to disturbance and nutrients in two *Plantago* species.  
649 *Oikos*, 119(11), 1700–1710. doi: 10.1111/j.1600-0706.2010.18737.x
- 650 Liang, M., Liu, X., Etienne, R. S., Huang, F., Wang, Y., & Yu, S. (2015). Arbuscular  
651 mycorrhizal fungi counteract the Janzen-Connell effect of soil pathogens. *Ecology*,  
652 96(2), 562–574. doi: 10.1890/14-0871.1
- 653 Lu, X., & Koide, R. T. (1994). The effects of mycorrhizal infection on components of

- 654 plant growth and reproduction. *New Phytologist*, 128(2), 211–218. Retrieved from  
655 <https://nph.onlinelibrary.wiley.com/doi/pdf/10.1111/j.1469-8137.1994.tb04004.x>
- 656 Luo, J., & Cardina, J. (2012). Germination patterns and implications for invasiveness in  
657 three *Taraxacum* (Asteraceae) species. *Weed Research*, 52(2), 112–121. doi:  
658 10.1111/j.1365-3180.2011.00898.x
- 659 Maherali, H. (2014). Is there an association between root architecture and mycorrhizal  
660 growth response? *New Phytologist*, 204(1), 192–200. doi: 10.1111/nph.12927
- 661 Martínez-García, L. B., de Dios Miranda, J., & Pugnaire, F. I. (2012). Impacts of  
662 changing rainfall patterns on mycorrhizal status of a shrub from arid environments.  
663 *European Journal of Soil Biology*, 50, 64–67. doi: 10.1016/J.EJSOBI.2011.12.005
- 664 McGonigle, T. P., Miller, M. H., Evans, D. G., Fairchild, G. L., & Swan, J. A. (1990). A  
665 new method which gives an objective measure of colonization of roots by  
666 vesicular—arbuscular mycorrhizal fungi. *New Phytologist*, 115(3), 495–501. doi:  
667 10.1111/j.1469-8137.1990.tb00476.x
- 668 McNamara, N. P., Black, H. I. J., Beresford, N. A., & Parekh, N. R. (2003). Effects of  
669 acute gamma irradiation on chemical, physical and biological properties of soils.  
670 *Applied Soil Ecology*, 24(2), 117–132. doi: 10.1016/S0929-1393(03)00073-8
- 671 Metz, J., von Oppen, J., & Tielbörger, K. (2015). Parental environmental effects due to  
672 contrasting watering adapt competitive ability, but not drought tolerance, in  
673 offspring of a semi-arid annual Brassicaceae. *Journal of Ecology*, 103(4), 990–997.  
674 doi: 10.1111/1365-2745.12411
- 675 Nuortila, C., Kytöviita, M.-M., & Tuomi, J. (2004). Mycorrhizal symbiosis has  
676 contrasting effects on fitness components in *Campanula rotundifolia*. *New*  
677 *Phytologist*, 164(3), 543–553. doi: 10.1111/j.1469-8137.2004.01195.x
- 678 Peay, K. G. (2016). The Mutualistic Niche: Mycorrhizal Symbiosis and Community  
679 Dynamics. *Annual Review of Ecology, Evolution, and Systematics*, 47(1), 143–164.  
680 doi: 10.1146/annurev-ecolsys-121415-032100
- 681 Pozo, M. J., López-Ráez, J. A., Azcón-Aguilar, C., & García-Garrido, J. M. (2015,  
682 March 1). Phytohormones as integrators of environmental signals in the regulation  
683 of mycorrhizal symbioses. *New Phytologist*, Vol. 205, pp. 1431–1436. doi:

- 684 10.1111/nph.13252
- 685 Price, T. D., Qvarnström, A., & Irwin, D. E. (2003, July 22). The role of phenotypic  
686 plasticity in driving genetic evolution. *Proceedings of the Royal Society B:*  
687 *Biological Sciences*, Vol. 270, pp. 1433–1440. doi: 10.1098/rspb.2003.2372
- 688 Puy, J., Carmona, C. P., Dvořáková, H., Latzel, V., & de Bello, F. (2020). Diversity of  
689 parental environments increases phenotypic variation in Arabidopsis populations  
690 more than genetic diversity but similarly affects productivity. *Annals of Botany*,  
691 mcaa100. doi: 10.1093/aob/mcaa100
- 692 Puy, J., de Bello, F., Dvořáková, H., Medina, N. G., Latzel, V., & Carmona, C. P.  
693 (2020). Competition-induced transgenerational plasticity influences competitive  
694 interactions and leaf decomposition of offspring. *New Phytologist*, nph.17037. doi:  
695 10.1111/nph.17037
- 696 Puy, J., Dvořáková, H., Carmona, C. P., de Bello, F., Hiiesalu, I., & Latzel, V. (2018).  
697 Improved demethylation in ecological epigenetic experiments: Testing a simple  
698 and harmless foliar demethylation application. *Methods in Ecology and Evolution*,  
699 9(3), 744–753. doi: 10.1111/2041-210X.12903
- 700 Rendina González, A. P., Preite, V., Verhoeven, K. J. F., & Latzel, V. (2018).  
701 Transgenerational Effects and Epigenetic Memory in the Clonal Plant *Trifolium*  
702 *repens*. *Frontiers in Plant Science*, 9, 1677. doi: 10.3389/fpls.2018.01677
- 703 Rottstock, T., Kummer, V., Fischer, M., & Joshi, J. (2017). Rapid transgenerational  
704 effects in *Knautia arvensis* in response to plant community diversity. *Journal of*  
705 *Ecology*, 105(3), 714–725. doi: 10.1111/1365-2745.12689
- 706 Shumway, D. L., & Koide, R. T. (1994). Reproductive responses to mycorrhizal  
707 colonization of *Abutilon theophrasti* Medic, plants grown for two generations in  
708 the field. *New Phytologist*, Vol. 128, pp. 219–224. doi: 10.1111/j.1469-  
709 8137.1994.tb04005.x
- 710 Šmilauer, P., Košnar, J., Kotlínek, M., & Šmilauerová, M. (2020). Contrasting effects  
711 of host identity, plant community, and local species pool on the composition and  
712 colonization levels of arbuscular mycorrhizal fungal community in a temperate  
713 grassland. *New Phytologist*, 225(1), 461–473. doi: 10.1111/nph.16112



- 714 Smith, S. E., & Read, D. J. (2008). *Mycorrhizal symbiosis*. Academic Press.
- 715 Spatafora, J. W., Chang, Y., Benny, G. L., Lazarus, K., Smith, M. E., Berbee, M. L., ...  
716 Stajich, J. E. (2016). A phylum-level phylogenetic classification of zygomycete  
717 fungi based on genome-scale data. *Mycologia*, *108*(5), 1028–1046. doi:  
718 10.3852/16-042
- 719 Titus, J. H., & Lepš, J. (2000). The response of arbuscular mycorrhizae to fertilization,  
720 mowing, and removal of dominant species in a diverse oligotrophic wet meadow.  
721 *American Journal of Botany*, *87*(3), 392–401. doi: 10.2307/2656635
- 722 Toorop, P. E., Campos Cuerva, R., Begg, G. S., Locardi, B., Squire, G. R., & Iannetta,  
723 P. P. M. (2012). Co-adaptation of seed dormancy and flowering time in the arable  
724 weed *Capsella bursa-pastoris* (shepherds purse). *Annals of Botany*, *109*(2), 481–  
725 489. doi: 10.1093/aob/mcr301
- 726 van der Heijden, M. G. A., Klironomos, J. N., Ursic, M., Moutoglis, P., Streitwolf-  
727 Engel, R., Boller, T., ... Sanders, I. R. (1998). Mycorrhizal fungal diversity  
728 determines plant biodiversity, ecosystem variability and productivity. *Nature*,  
729 *396*(6706), 69–72. doi: 10.1038/23932
- 730 van der Heijden, M. G. A., Wiemken, A., & Sanders, I. R. (2003). Different arbuscular  
731 mycorrhizal fungi alter coexistence and resource distribution between co-occurring  
732 plant. *New Phytologist*, *157*(3), 569–578. doi: 10.1046/j.1469-8137.2003.00688.x
- 733 Vannier, N., Mony, C., Bittebière, A. K., & Vandenkoornhuyse, P. (2015). Epigenetic  
734 mechanisms and microbiota as a toolbox for plant phenotypic adjustment to  
735 environment. *Frontiers in Plant Science*, *6*(DEC), 1159. doi:  
736 10.3389/fpls.2015.01159
- 737 Varga, S. (2010). Effects of arbuscular mycorrhizas on reproductive traits in sexually  
738 dimorphic plants: a review. *Spanish Journal of Agricultural Research*, *8*(S1), 11.  
739 doi: 10.5424/sjar/201008s1-5299
- 740 Varga, S., & Kytöviita, M. M. (2010). Mycorrhizal benefit differs among the sexes in a  
741 gynodioecious species. *Ecology*, *91*(9), 2583–2593. doi: 10.1890/09-1383.1
- 742 Varga, S., & Soulsbury, C. D. (2017). Paternal arbuscular mycorrhizal fungal status  
743 affects DNA methylation in seeds. *Biology Letters*, *13*(9), 20170407. doi:

744 10.1098/rsbl.2017.0407

745 Varga, S., & Soulsbury, C. D. (2019). Arbuscular mycorrhizal fungi change host plant  
746 DNA methylation systemically. *Plant Biology*, 21(2), 278–283. doi:  
747 10.1111/plb.12917

748 Varga, S., Vega-Frutis, R., & Kytöviita, M. M. (2013). Transgenerational effects of  
749 plant sex and arbuscular mycorrhizal symbiosis. *New Phytologist*, 199(3), 812–  
750 821. doi: 10.1111/nph.12305

751 Vellend, M. (2016). The Theory of Ecological Communities (MPB-57). In *The Theory*  
752 *of Ecological Communities (MPB-57)*. doi: 10.1515/9781400883790

753

#### 754 **Supporting information**

755 **Fig. S1:** N and C content of the substrate (AMF and NM).

756 **Fig. S2:** Schematic representation of the design of the offspring experiment.

757 **Fig. S3:** Effect of the treatments on parental generation.

758 **Fig. S4:** Effect of the offspring and parental treatments on frequency of AM structures  
759 of the juvenile and adult offspring.

760 **Fig. S5:** Correlation between pairs of plant traits and AM fungal colonization measured  
761 in juvenile and adult offspring plants.

762 **Fig. S6:** Relative effect of the offspring and parental treatments on total root AM fungal  
763 colonization and percentage of arbuscules on juvenile offspring.

764 **Table S1:** Summary of the linear mixed-effect model for main and interaction effects of  
765 the treatments in the parental generation.

766 **Table S2:** Summary of the linear mixed-effect model for main and interaction effects of  
767 offspring and parental treatments on juvenile offspring.

768 **Table S3:** Summary of the linear mixed-effect model for main and interaction effects of  
769 offspring and parental treatments on adult offspring.

770 **Figures:**

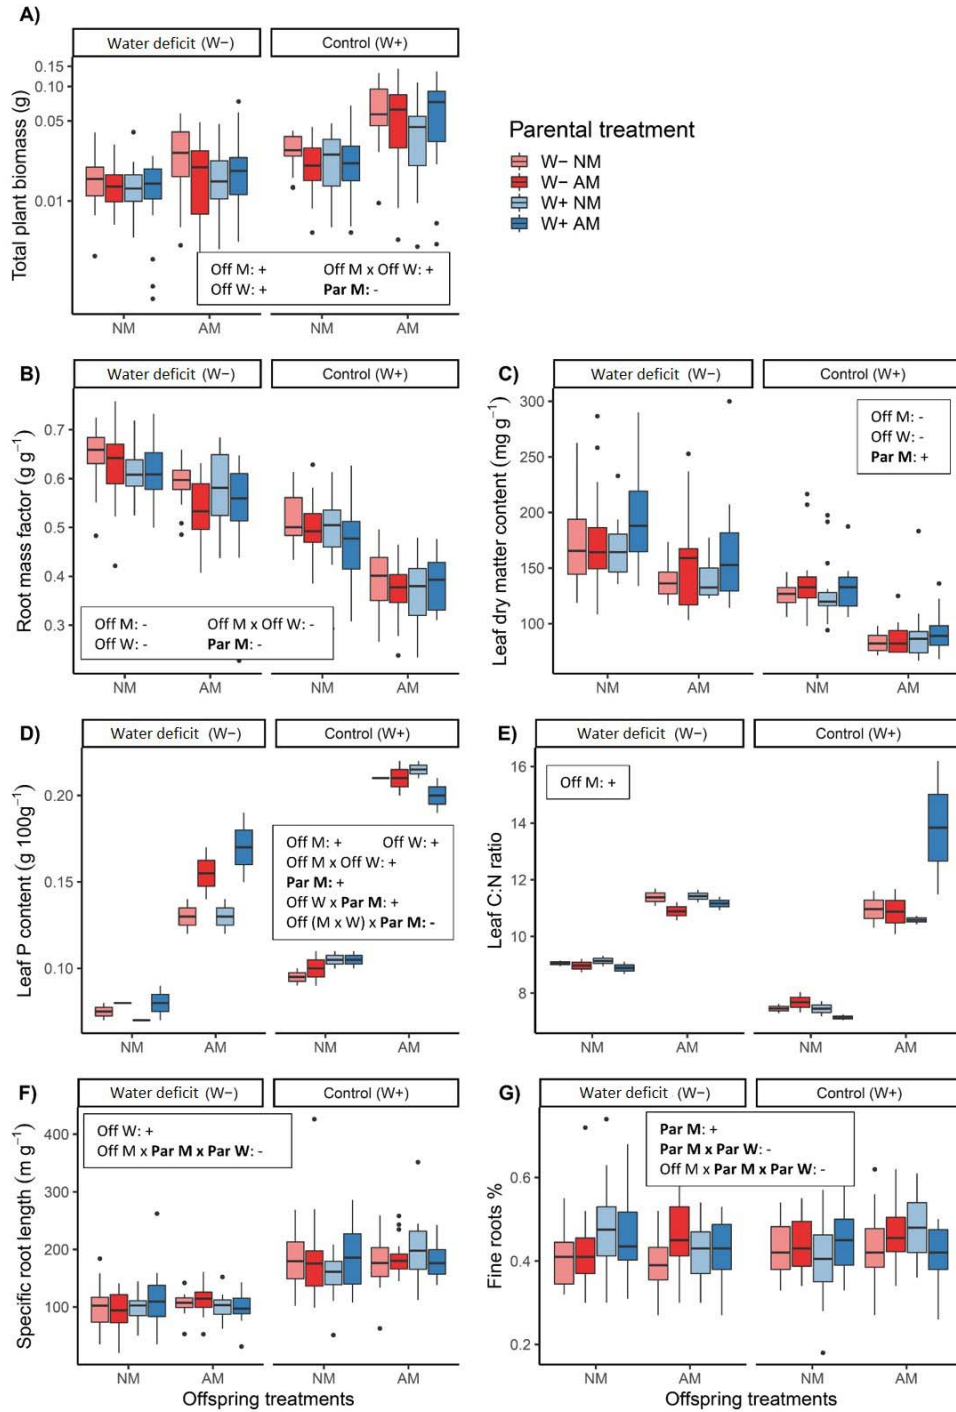

771

772 **Figure 1:** Effect of the offspring and parental treatments on plant phenotype  
 773 characteristics of the juvenile offspring. a) total plant biomass, b) root mass factor, c)  
 774 leaf dry matter content, d) leaf P content, e) leaf C:N ratio, f) specific root length and g)  
 775 fine roots percentage. The significant factors of each model with the directionality of

776 each effect are shown in the boxes. The factors corresponded to the offspring  
777 conditions: mycorrhizal inoculation treatment, Off. M; and water availability treatment  
778 Off. W; and the parental conditions (also highlighted in bold face): mycorrhizal  
779 inoculation treatment, Par. M; and water availability treatment, Par. W. Colour coding  
780 indicates the parental treatments: red - offspring of water-deficited parents, blue -  
781 offspring of parents that experienced water control conditions; intense colour - offspring  
782 of mycorrhizal parents, light colour - offspring of non-mycorrhizal parents. The bottom  
783 and top of the boxes are the 25th and 75th percentiles respectively, the centred band is  
784 the median and the whiskers represent 1.5 times the length of the box further from the  
785 box limits or the maximum or minimum observation in the absence of outliers.

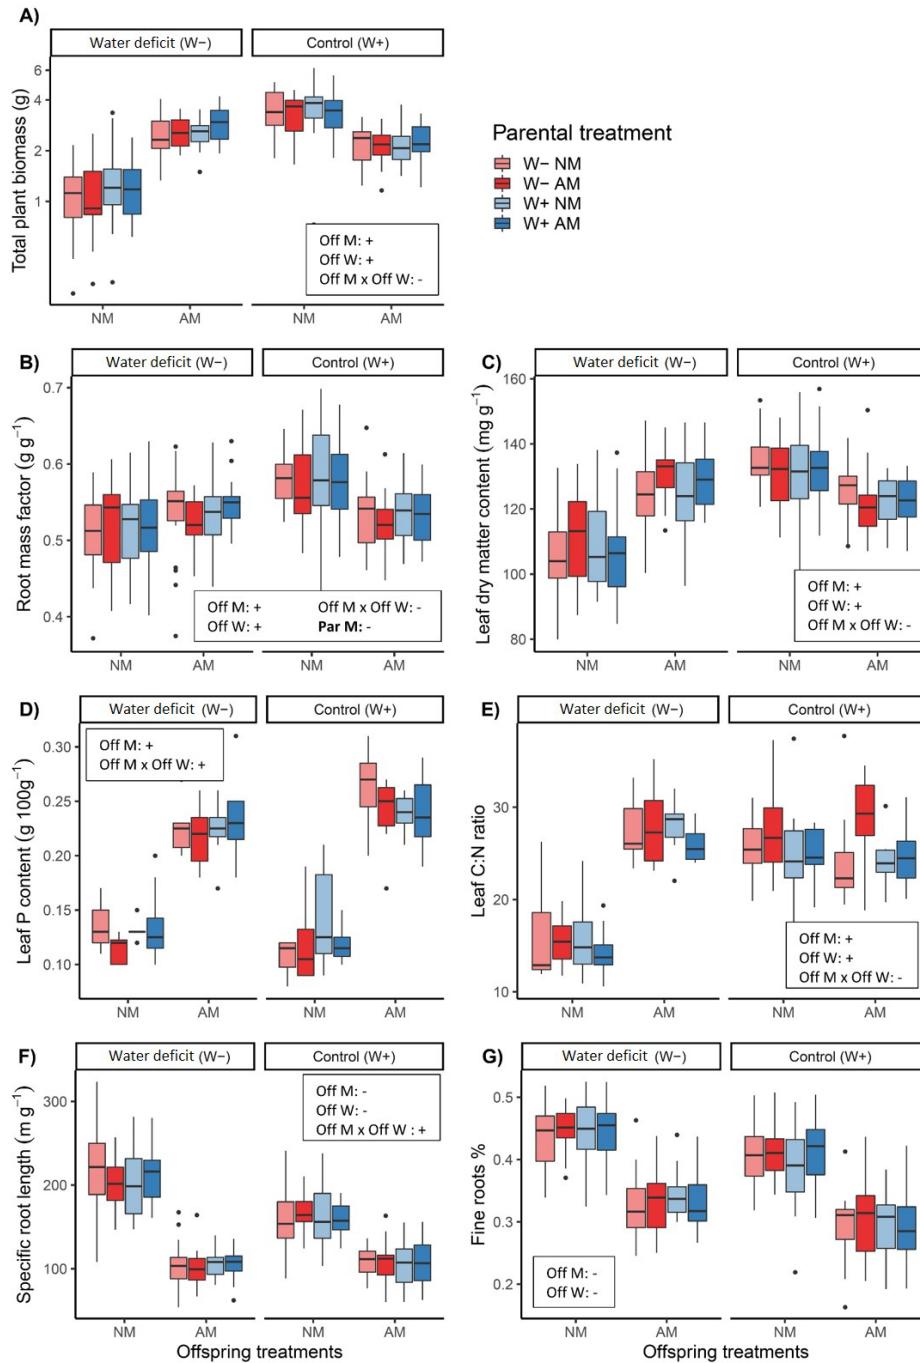

**Figure 2:** Effect of the offspring and parental treatments on plant phenotype characteristics of the adult offspring. a) total plant biomass, b) root mass factor, c) leaf dry matter content, d) leaf P content, e) leaf C:N ratio, f) specific root length and g) fine roots percentage. The significant factors of each model with the directionality of each effect are shown in the boxes. The factors corresponded to the offspring conditions: mycorrhizal fungal inoculation treatment, Off. M; and water availability treatment Off.

W; and the parental conditions (also highlighted in bold face): mycorrhizal inoculation treatment, Par. M; and water availability treatment, Par. W. Colour coding indicates the parental treatments: red - offspring of water-deficited parents, blue - offspring of parents that experienced water control conditions; intense colour - offspring of mycorrhizal parents, light colour - offspring of non-mycorrhizal parents.

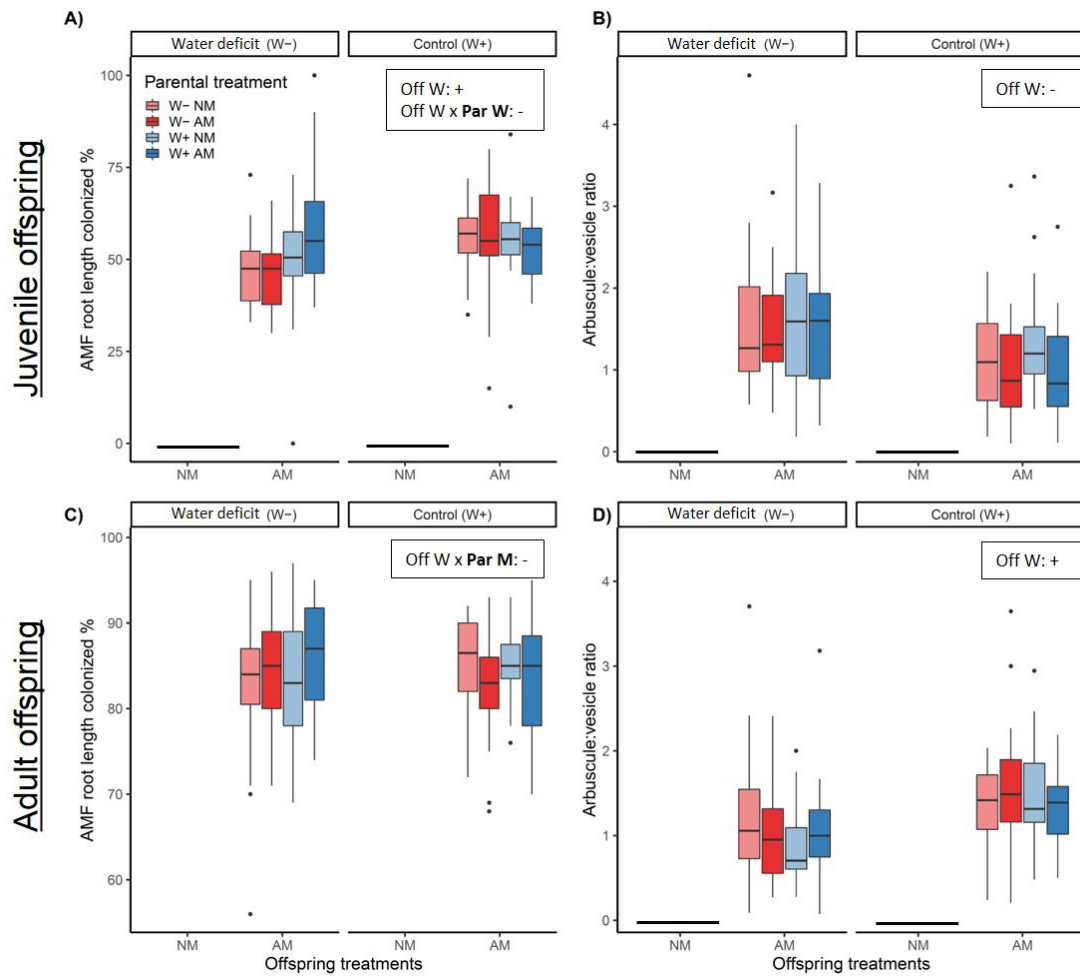

**Figure 3:** Effect of the offspring and parental treatments on AM fungal root colonisation in juvenile stage (upper row) and adult stage (lower row): a) and c) percentage of root length colonized by AM fungi; b) and d) arbuscule:vesicle ratio. The significant factors of each model with the directionality of each effect are shown in the boxes. The factors corresponded to the offspring conditions: mycorrhizal inoculation treatment, Off. M; and water availability treatment Off. W; and the parental conditions (also highlighted in bold face): mycorrhizal inoculation treatment, Par. M; and water availability treatment, Par. W. Colour coding indicates the parental treatments: red - offspring of water-deficited parents, blue - offspring of parents that experienced water control conditions; intense colour - offspring of mycorrhizal parents, light colour - offspring of non-mycorrhizal parents. The nonmycorrhizal offspring treatment plants were not colonized by AM fungi.
